# Supplementary material
Source: PubMed Central journal article supplement (PMC3735443)
Supplement: NIHMS456151-supplement-Appendix_Gonzalez.pdf [file NIHMS456151-supplement-Appendix_Gonzalez.pdf]

## Strong smokefree law coverage in the US by race/ethnicity: 2000 – 2009

### Expanded Description of Law Coding Scheme

Mariaelena Gonzalez  
 Ashley Sanders-Jackson  
 Anna V. Song  
 Kai-Wen Cheng  
 Stanton A. Glantz

In our analysis we used the American Nonsmokers Rights Foundation (ANRF) ordinance database. ANRF has provided us with state, city, and county-level data on three types of smoking restrictions: workplace, restaurants, and bar protections from 1995 to 2010. The rating of the laws were conducted by ANRF analysts who were blind to the aims and hypotheses of the study.

The laws' provisions have been categorized using 0-4 scale (0=no protection, 1=weak protection, 2=moderate protection, 3=qualified protection, and 4=100% smoke-free). However, because of specific provisions of the law may vary by types (bars laws are written differently than workplace laws), the categorization varied by law, see the below table. In designing the rating system, we were guided by the outside expertise of ANRF in order to determine equivalent levels of strength among the three types of venue laws.

| Protection (Rating)             | Private Workplace                                                                                                                                                                                                                                                                                                                                                                                                                                        | Restaurant                                                                                                                                                                                                                                                                                                                                                                                                                                              | Bar                                                                                                                             |
|---------------------------------|----------------------------------------------------------------------------------------------------------------------------------------------------------------------------------------------------------------------------------------------------------------------------------------------------------------------------------------------------------------------------------------------------------------------------------------------------------|---------------------------------------------------------------------------------------------------------------------------------------------------------------------------------------------------------------------------------------------------------------------------------------------------------------------------------------------------------------------------------------------------------------------------------------------------------|---------------------------------------------------------------------------------------------------------------------------------|
| 100% Smokefree (Rating=4)       | All private workplaces must be completely smokefree, <i>without exception</i> .                                                                                                                                                                                                                                                                                                                                                                          | All restaurants must be completely smokefree, <i>without exception</i> .                                                                                                                                                                                                                                                                                                                                                                                | All freestanding bars must be completely smokefree, <i>without exception</i> .                                                  |
| Qualified Protection (Rating=3) | Private workplaces must be smokefree with two possible general exceptions: (a) Workplaces with a specified number of employees or fewer (but more than one employee) are exempt. If the exemption in an ordinance is for one employee only (whether or not the employer), it is marked as "Yes" in this field. (b) Smoking is permitted in enclosed, separately ventilated smoking rooms, as described below for the "Separately Ventilated Room" field. | Restaurants must be smokefree with three possible exceptions: (a) Smoking is permitted in enclosed, separately ventilated dining rooms, as described below for the "Separately Ventilated Dining" field. (b) Restaurants with a specified number of seats or fewer are exempt. (c) Smoking is permitted in attached bars. Ordinances that permit smoking in restaurants during certain hours of operation or when minors are excluded are not included. | Freestanding bars must be smokefree with one possible exception: Smoking is permitted in enclosed, separately ventilated rooms. |

| Protection (Rating)            | Private Workplace                                                                                                                                                                                                                                          | Restaurant                                                                                                                                                                                                                                                                                                                                                                  | Bar                                                                                |
|--------------------------------|------------------------------------------------------------------------------------------------------------------------------------------------------------------------------------------------------------------------------------------------------------|-----------------------------------------------------------------------------------------------------------------------------------------------------------------------------------------------------------------------------------------------------------------------------------------------------------------------------------------------------------------------------|------------------------------------------------------------------------------------|
| Moderate Protection (Rating=2) | There is some coverage for private workplaces, but less than either of the above two categories.                                                                                                                                                           | There is some coverage for restaurants, but less than either of the above two categories, and <u>only one</u> of the following is true: (a) Less than 50% in Minimum nonsmoking area field; (b) An exemption when seating is 50 or more; or (c) Contains an hours of operation clause (specific hours not necessary; whether or not they have such a clause is sufficient). | There is some coverage for bars, but less than either of the above two categories. |
| Weak Protection (Rating=1)     | There is some coverage for private workplaces, but there is no coverage in (1) Private offices, (2) Common work areas, (3) Meeting rooms, (4) Designate own area, and (5) Separately ventilated room, OR coverage no more than 1 in any of these 5 fields. | There is some coverage for restaurants, and <u>two or more</u> of the following is true: (a) Less than 50% in Minimum nonsmoking area field; (b) An exemption when seating is 50 or more; or (c) Contains an hours of operation clause (specific hours not necessary; whether or not they have such a clause is sufficient).                                                | Category not applicable to bars                                                    |
| No protection (Rating=0)       | There is no private workplaces coverage at all.                                                                                                                                                                                                            | There is no restaurant coverage at all.                                                                                                                                                                                                                                                                                                                                     | There is no bar coverage at all.                                                   |
